# Supplementary material for: Serial femtosecond crystallography structure of cytochrome c oxidase at room temperature
Source: PubMed Central journal article supplement (PMC5495810; doi:10.1038/s41598-017-04817-z), 2017-07-03
Supplement: 41598_2017_4817_MOESM1_ESM.pdf [file 41598_2017_4817_MOESM1_ESM.pdf]

## Supplementary Information

### **Serial femtosecond crystallography structure of cytochrome c oxidase at room temperature**

Rebecka Andersson<sup>1</sup>, Cecilia Safari<sup>1</sup>, Robert Dods<sup>1</sup>, Eriko Nango<sup>2,3</sup>, Rie Tanaka<sup>2</sup>, Ayumi Yamashita<sup>2</sup>, Takanori Nakane<sup>4</sup>, Kensuke Tono<sup>5</sup>, Yasumasa Joti<sup>5</sup>, Petra Båth<sup>1</sup>, Elin Dunevall<sup>1</sup>, Robert Bosman<sup>1</sup>, Osamu Nureki<sup>4</sup>, So Iwata<sup>2,3</sup>, Richard Neutze<sup>1</sup> & Gisela Brändén<sup>1\*</sup>

<sup>1</sup>Department of Chemistry and Molecular Biology, University of Gothenburg, Box 462, SE-40530 Gothenburg, Sweden.

<sup>2</sup>RIKEN Spring-8 Center, 1-1-1 Kouto, Sayo-cho, Sayo-gun, Hyogo 679-5148, Japan.

<sup>3</sup>Department of Cell Biology, Graduate School of Medicine, Kyoto University, Yoshidakonoe-cho, Sakyo-ku, Kyoto 606-8501, Japan.

<sup>4</sup>Department of Biological Sciences, Graduate School of Science, University of Tokyo, 2-11-16 Yayoi, Bunkyo-ku, Tokyo 113-0032, Japan.

<sup>5</sup>Japan Synchrotron Radiation Research Institute, 1-1-1 Kouto, Sayo-cho, Sayo-gun, Hyogo 679-5198, Japan

\*To whom correspondence should be addressed: [gisela.branden@gu.se](mailto:gisela.branden@gu.se)

**Supplementary Figure S1.**

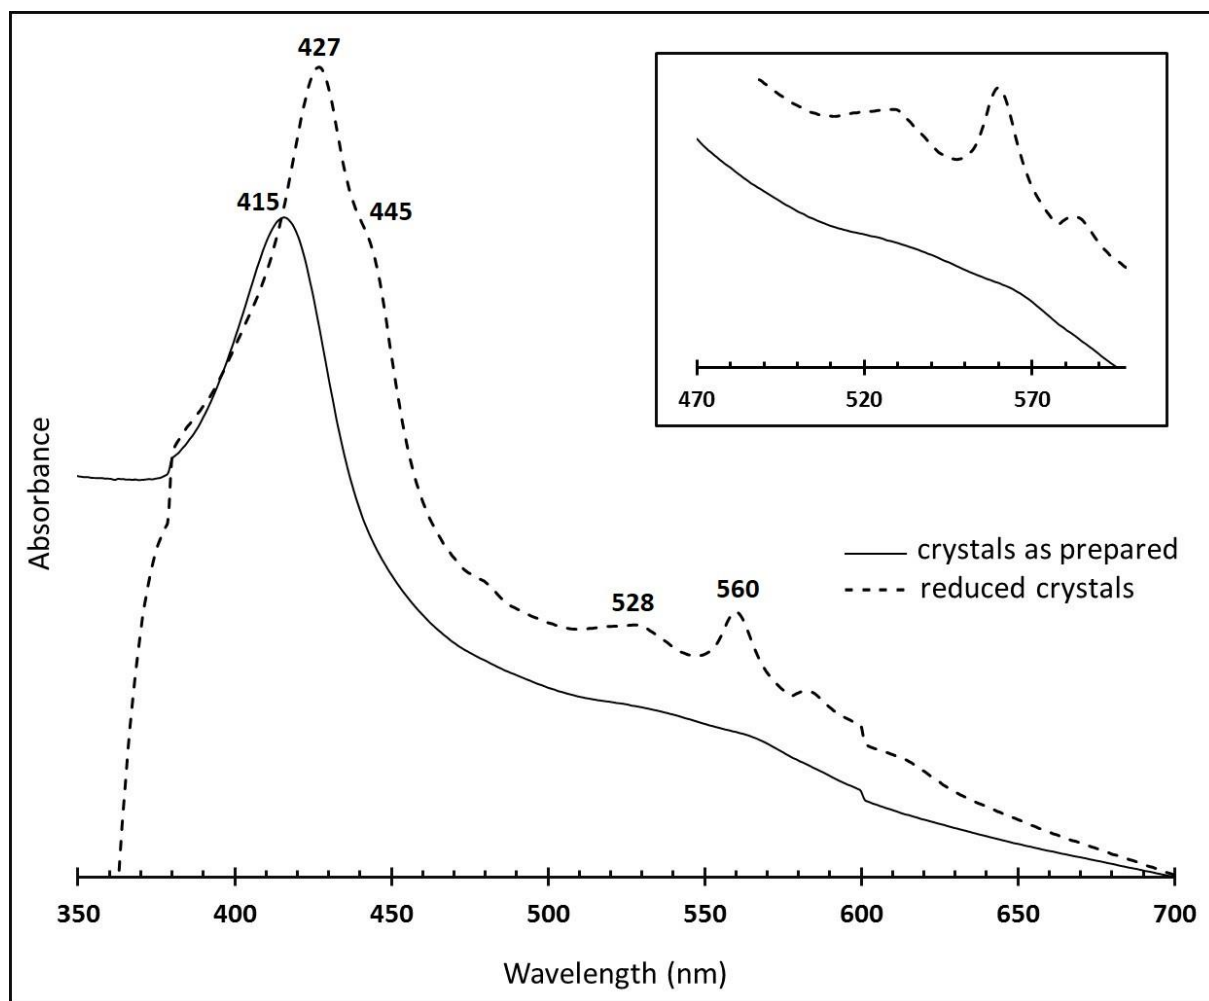

**Supplementary Figure S1. Optical absorbance spectra of *baz* CcO microcrystals.** The spectra for microcrystals as prepared (oxidized state) and after addition of dithionite (reduced state) are shown. The oxidized sample has a peak at 415 nm and the reduced sample at 427 nm, 445 nm (shoulder), 528 nm and 560 nm.

**Supplementary Figure S2.**

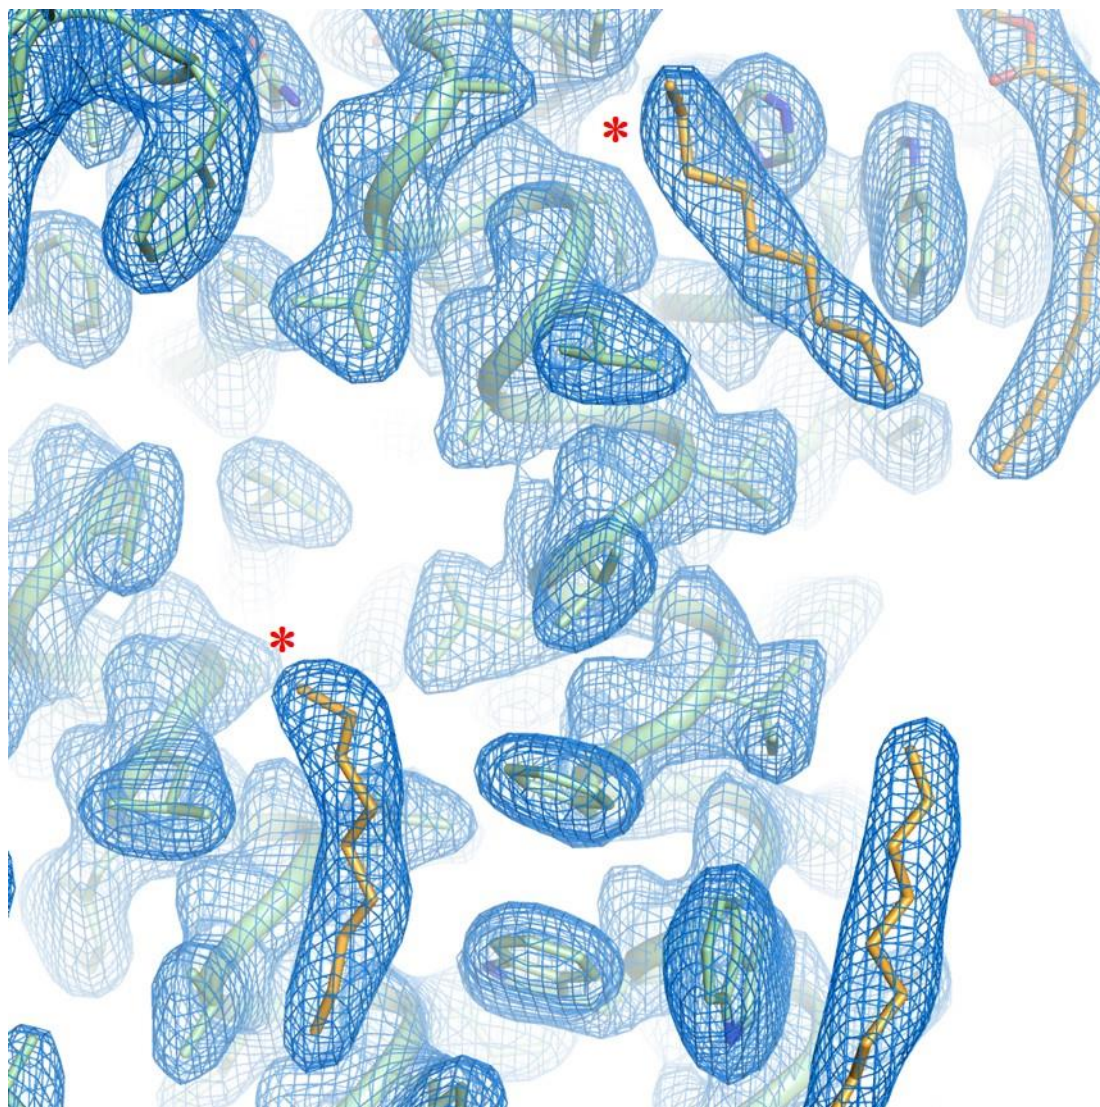

**Supplementary Figure S2. SFX structure of *ba3 CcO* displaying previously unresolved lipid molecules.** Subunit I is shown in green and lipid molecules in orange. The  $2F_o - F_c$  density (blue) is contoured at  $1.0 \sigma$ . Newly resolved lipid tails are highlighted with an asterisk.

**Supplementary Figure S3.**

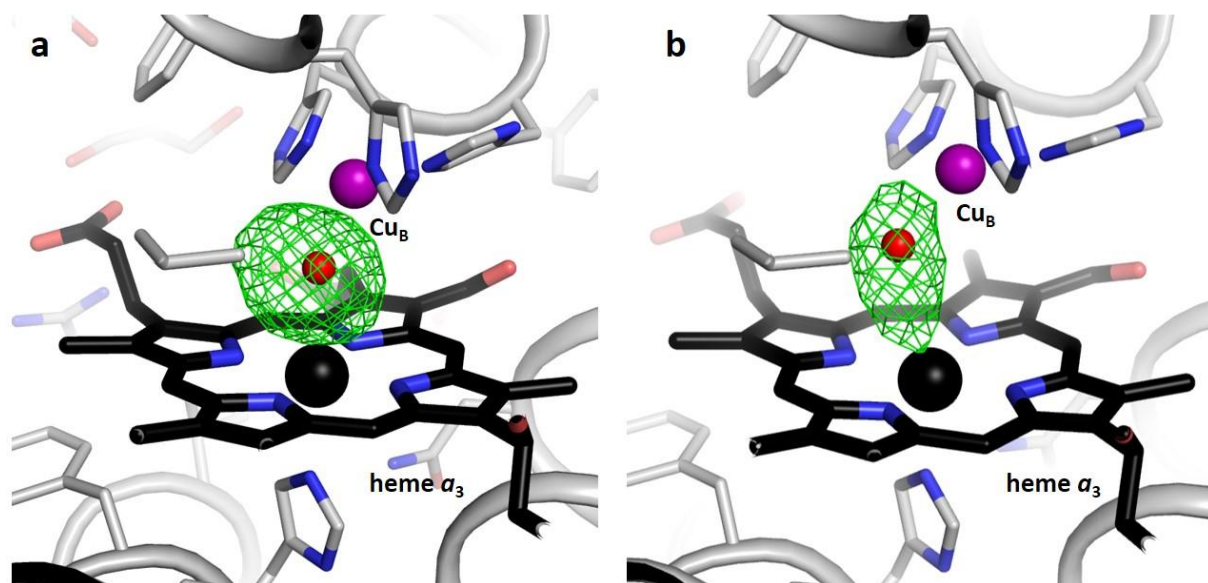

**Supplementary Figure S3. Active site electron densities in *ba3* CcO structures crystallized by vapor diffusion.**  $F_o - F_c$  omit map densities (green) contoured at  $4.5 \sigma$ , calculated without any active site ligand for (a) PDB code 1XME and (b) PDB code 3EH4. For all structures resulting from vapor diffusion crystallization, a water molecule or no ligand is modeled in the active site. In contrast, elongated active-site electron density in the deposited LCP structures is interpreted as a peroxide ligand (Supplementary Table S1).

**Supplementary Table S1.**

| <b>PDB code</b> | <b>year released</b> | <b>crystallization method</b> | <b>resolution (Å)</b> | <b>active-site ligand</b> | <b>comment</b>                 |
|-----------------|----------------------|-------------------------------|-----------------------|---------------------------|--------------------------------|
| 1EHK            | 2000                 | vapor diffusion               | 2.4                   | water                     | no structure factors deposited |
| 1XME            | 2005                 | vapor diffusion               | 2.3                   | water                     |                                |
| 2QPE            | 2007                 | vapor diffusion               | 2.9                   | none                      | two surface mutations          |
| 2QPD            | 2007                 | vapor diffusion               | 3.25                  | none                      | one surface mutation           |
| 3EH5            | 2009                 | vapor diffusion               | 2.8                   | none                      | reduced enzyme                 |
| 3EH4            | 2009                 | vapor diffusion               | 2.9                   | water                     | crystals reduced in X-ray beam |
| 3EH3            | 2009                 | vapor diffusion               | 3.1                   | none                      | crystals reduced by dithionite |
| 3S8G            | 2011                 | LCP                           | 1.8                   | peroxide                  |                                |
| 3S8F            | 2011                 | LCP                           | 1.8                   | peroxide                  |                                |
| 3QJV            | 2012                 | vapor diffusion               | 2.8                   | CO                        | CO-pressurized crystals        |
| 3QJU            | 2012                 | vapor diffusion               | 2.9                   | CO                        | CO-pressurized crystals        |
| 3QJT            | 2012                 | vapor diffusion               | 2.95                  | CO                        | CO-pressurized crystals        |
| 3QJS            | 2012                 | vapor diffusion               | 2.8                   | CO                        | CO-pressurized crystals        |
| 3QJR            | 2012                 | vapor diffusion               | 3.2                   | CO                        | CO-pressurized crystals        |
| 3QJQ            | 2012                 | vapor diffusion               | 2.9                   | CO                        | CO-pressurized crystals        |
| 3S3D            | 2012                 | vapor diffusion               | 3.75                  | none                      | Xe-pressurized crystals        |
| 3S3C            | 2012                 | vapor diffusion               | 4.0                   | none                      | Xe-pressurized crystals        |
| 3S3B            | 2012                 | vapor diffusion               | 3.3                   | none                      | Xe-pressurized crystals        |
| 3S3A            | 2012                 | vapor diffusion               | 4.25                  | none                      | Xe-pressurized crystals        |
| 3S39            | 2012                 | vapor diffusion               | 4.8                   | none                      | Xe-pressurized crystals        |
| 3S38            | 2012                 | vapor diffusion               | 4.2                   | none                      | Xe-pressurized crystals        |
| 3S33            | 2012                 | vapor diffusion               | 4.45                  | none                      | Xe-pressurized crystals        |
| 4FA7            | 2012                 | LCP                           | 2.5                   | peroxide                  | A204F mutation                 |
| 4FAA            | 2012                 | LCP                           | 2.8                   | peroxide                  | A120F+A204F mutations          |
| 4GP8            | 2013                 | LCP                           | 2.8                   | peroxide                  | Y133W+T231F mutations          |
| 4GP5            | 2013                 | LCP                           | 2.7                   | peroxide                  | Y133W mutation                 |
| 4GP4            | 2013                 | LCP                           | 2.8                   | peroxide                  | Y133F mutation                 |
| 4G7S            | 2013                 | LCP                           | 2.0                   | peroxide                  | V236I mutation                 |
| 4G7R            | 2013                 | LCP                           | 3.05                  | peroxide                  | V236A mutation                 |
| 4G7Q            | 2013                 | LCP                           | 2.6                   | peroxide                  | V236L mutation                 |
| 4G72            | 2013                 | LCP                           | 3.19                  | peroxide                  | V236M mutation                 |
| 4G71            | 2013                 | LCP                           | 2.9                   | peroxide                  | V236N mutation                 |
| 4G70            | 2013                 | LCP                           | 2.6                   | peroxide                  | V236T mutation                 |
| 4N4Y            | 2014                 | LCP                           | 2.9                   | peroxide                  | G232V mutation                 |

**Supplementary Table S1. A summary of *ba3* CcO structures deposited in the PDB.**
